# Supplementary material for: A novel monoclinic metal oxide catalyst for oxygen evolution reactions in alkaline media
Source: Royal Society of Chemistry journal article supplement (doi:10.1039/d1qi01453f), 2022-01-01
Supplement: d1qi01453f1.pdf [file d1qi01453f1.pdf]

## Supporting Information

# **A novel monoclinic metal oxide catalyst for oxygen evolution reaction in alkaline media**

Yang Qian<sup>a</sup>, Xianlun Xu<sup>a</sup>, Yi He <sup>a</sup> , Lecheng Lei<sup>a,b</sup>, Yanghong Xia<sup>c</sup>, Xingwang Zhang<sup>a,b,\*</sup>

<sup>a</sup> Key Laboratory of Biomass Chemical Engineering of Ministry of Education, College of Chemical and Biological Engineering, Zhejiang University, Zheda Road No. 38, 310027 Hangzhou, China

<sup>b</sup> Institute of Zhejiang University-Quzhou, 324000 Quzhou, China

<sup>c</sup> Zhejiang University Zero-Carbon Emission Renewable Energy Laboratory, College of Electrical Engineering, Zhejiang University, Zheda Road No. 38, 310027 Hangzhou, China

E-mail: xwzhang@zju.edu.cn

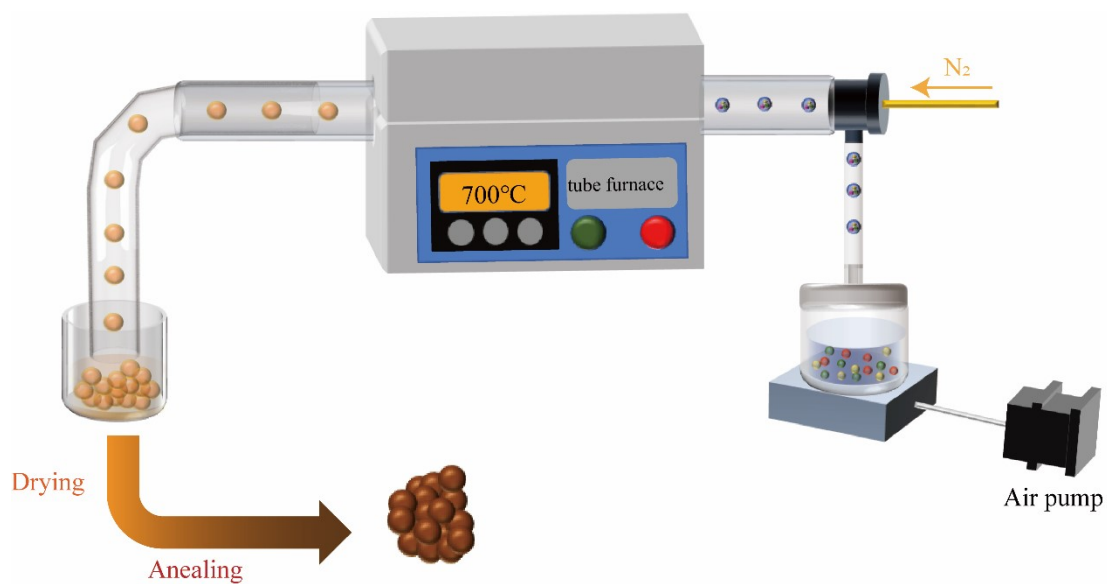

Figure S1. Synthesis strategy of  $\text{Co}_x\text{-Fe}_2(\text{MoO}_4)_3$ .

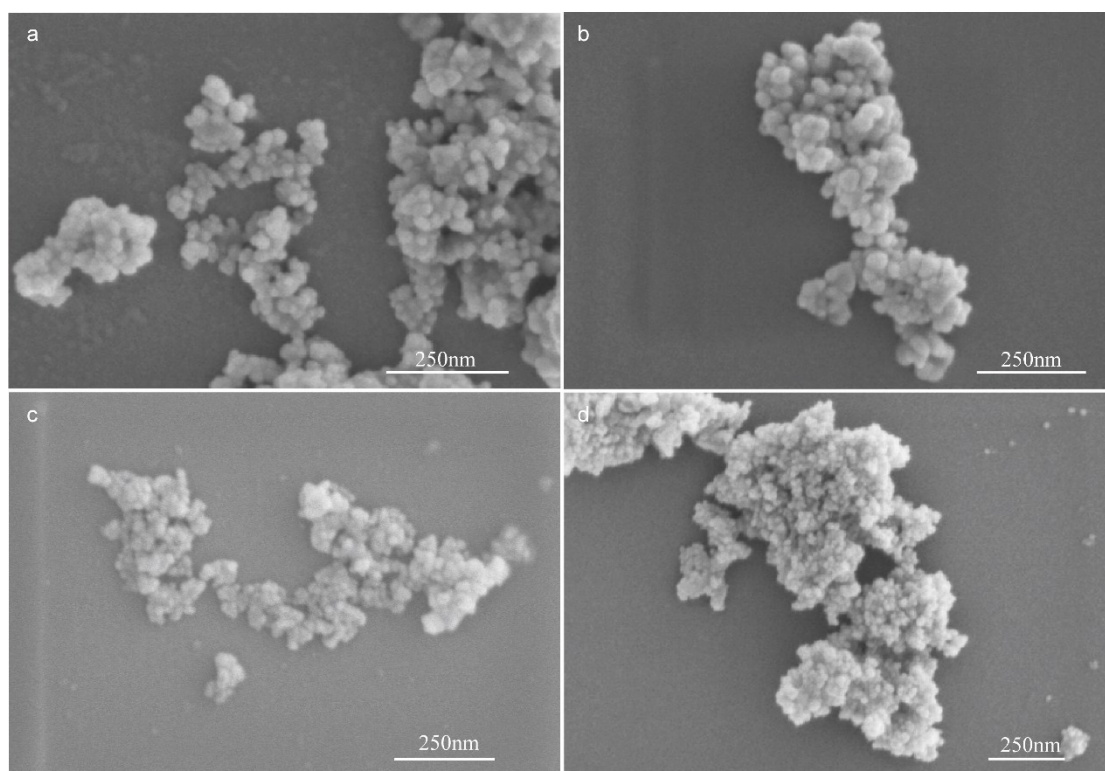

Figure S2. SEM images of (a) pure  $\text{Fe}_2(\text{MoO}_4)_3$ , (b)  $\text{Co}_{0.05}\text{-Fe}_2(\text{MoO}_4)_3$ , (c)  $\text{Co}_{0.1}\text{-Fe}_2(\text{MoO}_4)_3$ , (d)  $\text{Co}_{0.2}\text{-Fe}_2(\text{MoO}_4)_3$ .

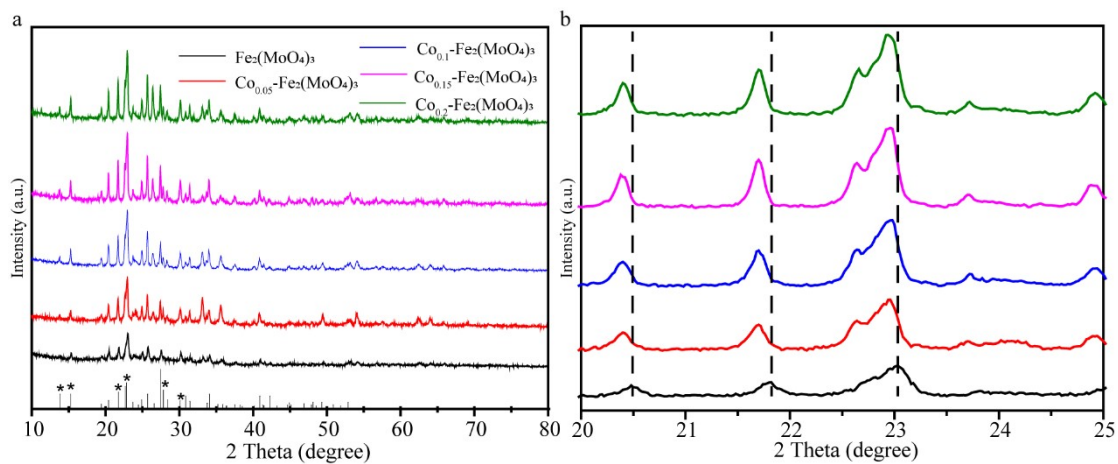

Figure S3. XRD patterns for with  $\text{Fe}_2(\text{MoO}_4)_3$  different cobalt doping ratio.

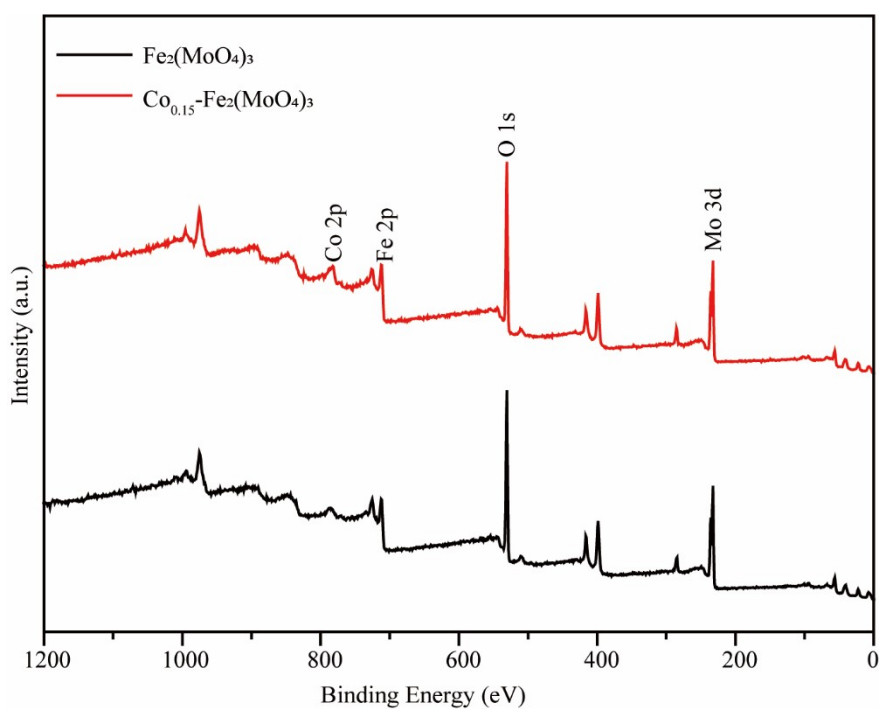

Figure S4. Full XPS survey scan for  $\text{Fe}_2(\text{MoO}_4)_3$  and  $\text{Co}_{0.15}\text{-Fe}_2(\text{MoO}_4)_3$ .

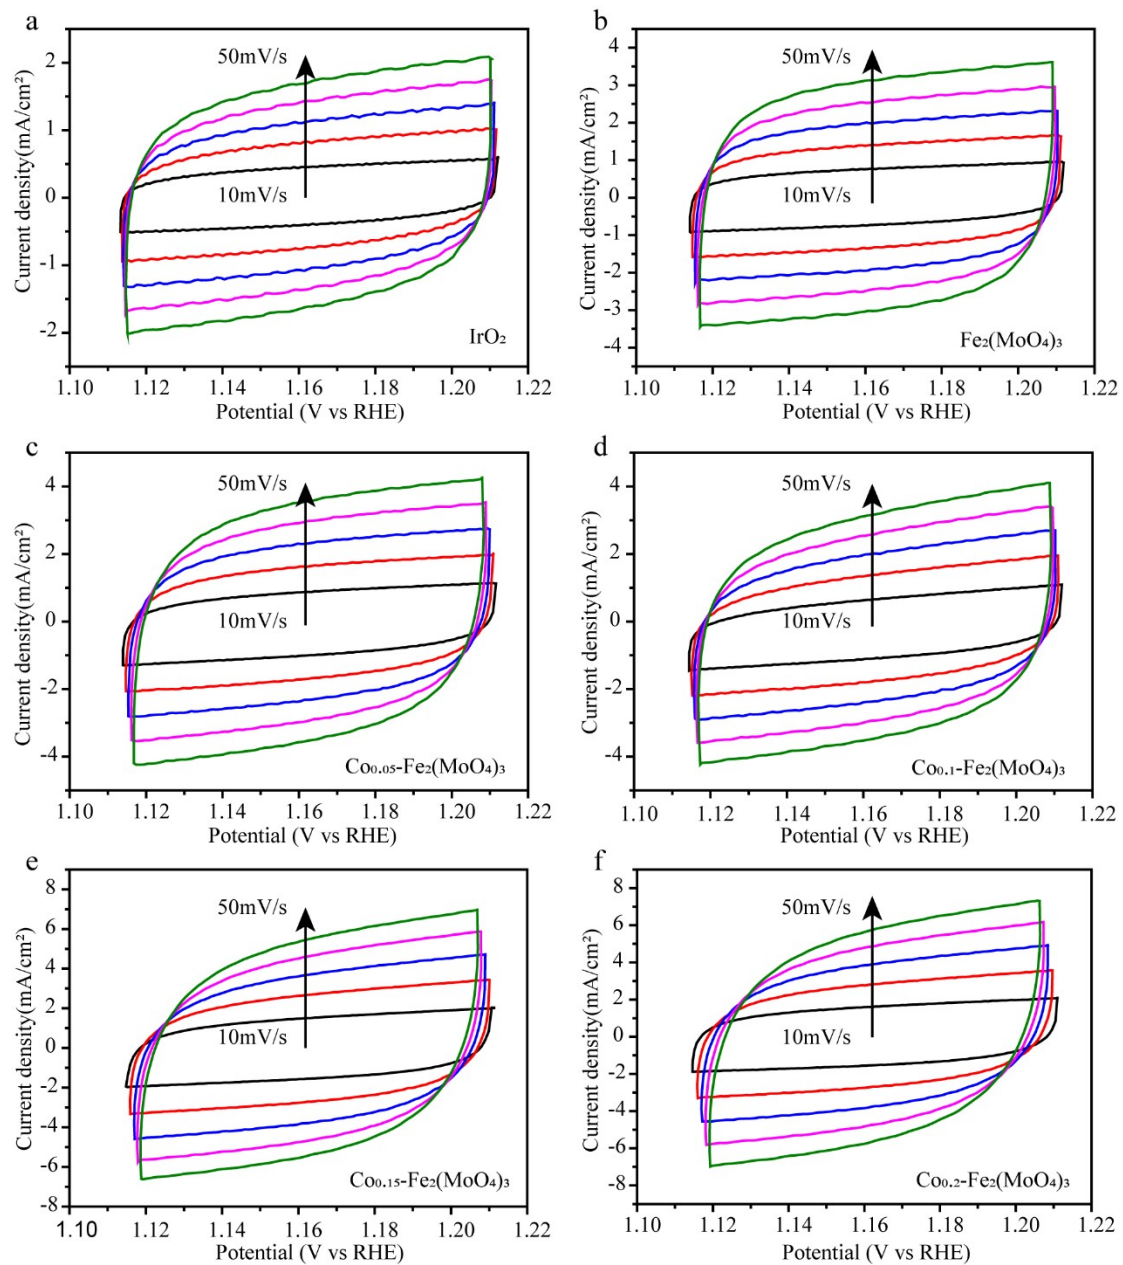

Figure S5. CV diagrams of (a) IrO<sub>2</sub>, (b) Fe<sub>2</sub>(MoO<sub>4</sub>)<sub>3</sub>, (c) Co<sub>0.05</sub>-Fe<sub>2</sub>(MoO<sub>4</sub>)<sub>3</sub>, (d) Co<sub>0.1</sub>-Fe<sub>2</sub>(MoO<sub>4</sub>)<sub>3</sub>, (e) Co<sub>0.15</sub>-Fe<sub>2</sub>(MoO<sub>4</sub>)<sub>3</sub>, (f) Co<sub>0.2</sub>-Fe<sub>2</sub>(MoO<sub>4</sub>)<sub>3</sub>.

Table S1 Comparison between  $\text{Co}_{0.15}\text{-Fe}_2(\text{MoO}_4)_3$  of this work and different reported transition metal oxide catalysts for OER in alkaline media

| Catalyst                                                          | Overpotential<br>(mV) at 10mA<br>$\text{cm}^{-2}$ | Stability   | Reference |
|-------------------------------------------------------------------|---------------------------------------------------|-------------|-----------|
| $\text{Co}_3\text{O}_{3.87}\text{F}_{0.13}$                       | 430                                               | 1500 cycles | 1         |
| $\text{CoVO}_x\text{-300}$                                        | 330                                               | 10h         | 2         |
| $\text{NiCo}_{1.7}\text{Ru}_{0.3}\text{O}_4$                      | 280                                               | 15h         | 3         |
| $\text{Co/CoO@NC@CC}$                                             | 284                                               | 25h         | 4         |
| $\text{NiMn/ NiCo}_2\text{O}_4$                                   | 310                                               | 8h          | 5         |
| $\text{Co@Co}_3\text{O}_4\text{/NC-2}$                            | 410                                               | 45h         | 6         |
| $\text{CoMoO}_x\text{/CoMoS}_x\text{/CoS}_x$                      | 281                                               | 40h         | 7         |
| $\text{CoV}_2\text{O}_6$                                          | 324                                               | 24h         | 8         |
| $\text{Geobacter-Mn}_2\text{O}_3$                                 | 290                                               | 22.5h       | 9         |
| $\text{Co}_{0.708}\text{Fe}_{0.292}\text{WO}_4$                   | 327                                               | 7h          | 10        |
| $\text{CoMoO}_4$ nanorod                                          | 350                                               | 10h         | 11        |
| $\text{LaSr}_3\text{Co}_{1.5}\text{Fe}_{1.5}\text{O}_{10-\delta}$ | 388                                               | 5h          | 12        |
| $\text{Co}_{0.15}\text{-Fe}_2(\text{MoO}_4)_3$                    | 273                                               | 80h         | This work |

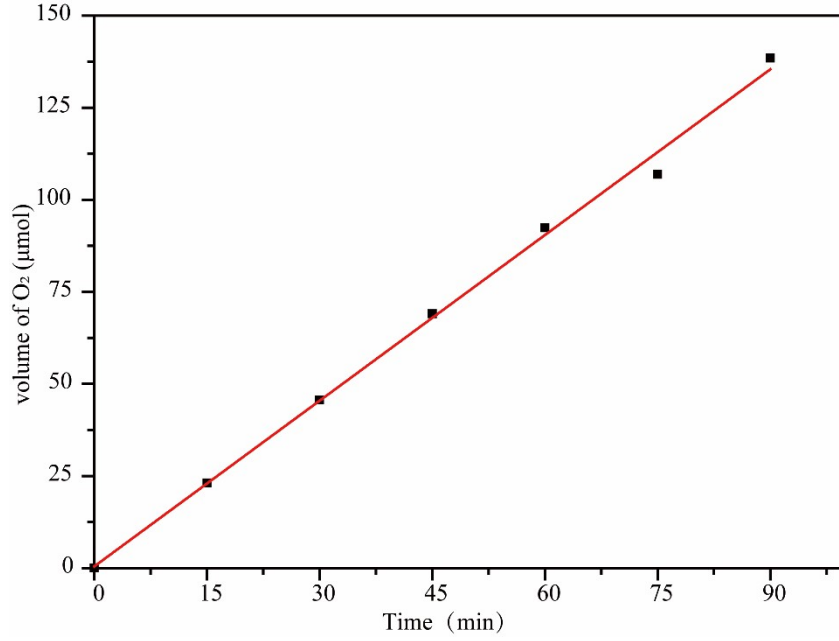

Figure S6. Content of O<sub>2</sub> generated of OER for Co<sub>0.15</sub>-Fe<sub>2</sub>(MoO<sub>4</sub>)<sub>3</sub>.

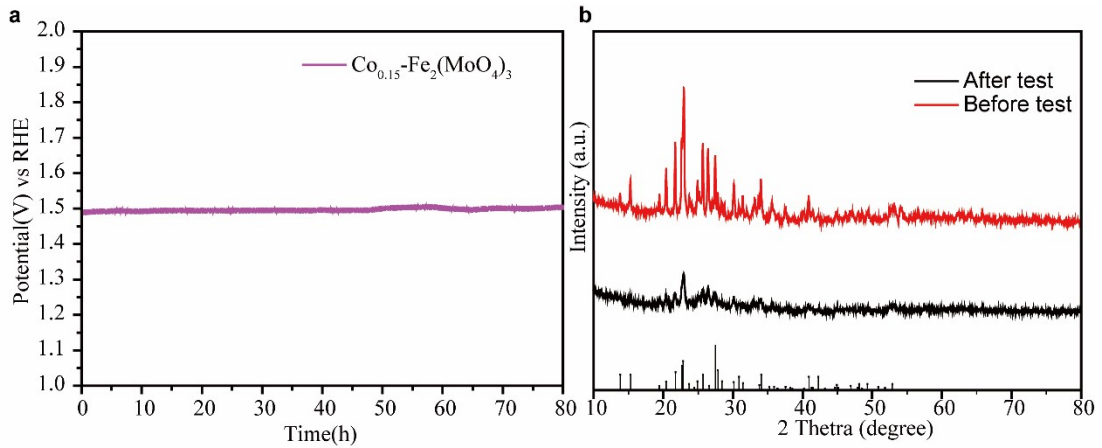

Figure S7. (a) Chronopotentiometry durability test under 10 mA cm<sup>-2</sup> for Co<sub>0.15</sub>-Fe<sub>2</sub>(MoO<sub>4</sub>)<sub>3</sub>, (b) The comparison diagram for XRD patterns of Co<sub>0.15</sub>-Fe<sub>2</sub>(MoO<sub>4</sub>)<sub>3</sub> before and after stability test.

The chemical equations of OER mechanism in alkaline media<sup>13, 14</sup>:

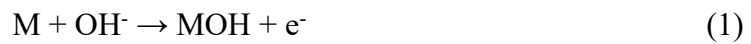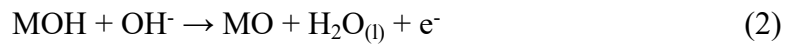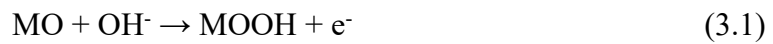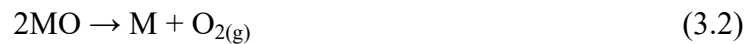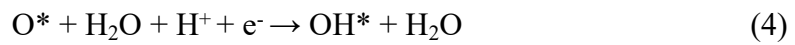

The active site is written as “M”. In most cases, the reaction process follows the steps of (1) → (2) → (3.1) → (4) instead of (1) → (2) → (3.2)

Table S2. ICP analysis for as-prepared  $\text{Co}_{0.15}\text{-Fe}_2(\text{MoO}_4)_3$

| Catalysts                                      | Element | Sample amount | Element Content | wt%    |
|------------------------------------------------|---------|---------------|-----------------|--------|
| $\text{Co}_{0.15}\text{-Fe}_2(\text{MoO}_4)_3$ | Co      | 108.7 mg      | 16276.45 mg/kg  | 1.628  |
|                                                | Fe      | 108.7 mg      | 171320.15 mg/kg | 17.132 |
|                                                | Mo      | 108.7 mg      | 461591.54 mg/kg | 46.159 |

## Reference

1. H. Zeng, M. h. Oubla, X. Zhong, N. Alonso-Vante, F. Du, Y. Xie, Y. Huang and J. Ma, Rational defect and anion chemistries in Co<sub>3</sub>O<sub>4</sub> for enhanced oxygen evolution reaction, *Appl. Catal., B*, 2021, **281**, 119535.
2. C. Jiang, J. Yang, T. Zhao, L. Xiong, Z.-X. Guo, Y. Ren, H. Qi, A. Wang and J. Tang, Co<sup>3+</sup>-O-V<sup>4+</sup> cluster in CoVO<sub>x</sub> nanorods for efficient and stable electrochemical oxygen evolution, *Appl. Catal., B*, 2021, **282**, 119571.
3. C. Peng, H. Liu, J. Chen, Y. Zhang, L. Zhu, Q. Wu, W. Zou, J. Wang, Z. Fu and Y. Lu, Modulating the potential-determining step in oxygen evolution reaction by regulating the cobalt valence in NiCo<sub>2</sub>O<sub>4</sub> via Ru substitution, *Appl. Surf. Sci.*, 2021, **544**, 148897.
4. K. Dai, N. Zhang, L. Zhang, L. Yin, Y. Zhao and B. Zhang, Self-supported Co/CoO anchored on N-doped carbon composite as bifunctional electrocatalyst for efficient overall water splitting, *Chem. Eng. J.*, 2021, **414**, 128804.
5. L. Yang, L. Chen, D. Yang, X. Yu, H. Xue and L. Feng, NiMn layered double hydroxide nanosheets/NiCo<sub>2</sub>O<sub>4</sub> nanowires with surface rich high valence state metal oxide as an efficient electrocatalyst for oxygen evolution reaction, *J. Power Sources*, 2018, **392**, 23-32.
6. A. Aijaz, J. Masa, C. Rosler, W. Xia, P. Weide, A. J. Botz, R. A. Fischer, W. Schuhmann and M. Muhler, Co@Co<sub>3</sub>O<sub>4</sub> Encapsulated in Carbon Nanotube-Grafted Nitrogen-Doped Carbon Polyhedra as an Advanced Bifunctional Oxygen Electrode, *Angew. Chem., Int. Ed.*, 2016, **55**, 4087-4091.
7. H. Xu, H. Shang, C. Wang, L. Jin, C. Chen, C. Wang and Y. Du, Three-dimensional open CoMoO<sub>x</sub>/CoMoS<sub>x</sub>/CoS<sub>x</sub> nanobox electrocatalysts for efficient oxygen evolution reaction, *Appl. Catal., B*, 2020, **265**, 118605.
8. G. M. Thorat, H. S. Jadhav, A. Roy, W.-J. Chung and J. G. Seo, Dual Role of Deep Eutectic Solvent as a Solvent and Template for the Synthesis of Octahedral Cobalt Vanadate for an Oxygen Evolution Reaction, *ACS Sustain. Chem. Eng.*, 2018, **6**, 16255-16266.
9. S. Kalathil, K. P. Katuri and P. E. Saikaly, Synthesis of an amorphous Geobacter-manganese oxide biohybrid as an efficient water oxidation catalyst, *Green Chem.*, 2020, **22**, 5610-5618.
10. W. Shao, Y. Xia, X. Luo, L. Bai, J. Zhang, G. Sun, C. Xie, X. Zhang, W. Yan and Y. Xie, Structurally distorted wolframite-type Co<sub>x</sub>Fe<sub>1-x</sub>WO<sub>4</sub> solid solution for enhanced oxygen evolution reaction, *Nano Energy*, 2018, **50**, 717-722.
11. X. Liu, Y. Yang and S. Guan, An efficient electrode based on one-dimensional CoMoO<sub>4</sub> nanorods for oxygen evolution reaction, *Chem. Phys. Lett.*, 2017, **675**, 11-14.
12. S. Liu, H. Luo, Y. Li, Q. Liu and J.-L. Luo, Structure-engineered electrocatalyst enables highly active and stable oxygen evolution reaction over layered perovskite LaSr<sub>3</sub>Co<sub>1.5</sub>Fe<sub>1.5</sub>O<sub>10-δ</sub>, *Nano Energy*, 2017, **40**, 115-121.
13. Z. Y. Yu, Y. Duan, X. Y. Feng, X. Yu, M. R. Gao and S. H. Yu, Clean and



Affordable Hydrogen Fuel from Alkaline Water Splitting: Past, Recent Progress, and Future Prospects, *Adv Mater*, 2021, **33**, e2007100.

14. F. Song, L. Bai, A. Moysiadou, S. Lee, C. Hu, L. Liardet and X. Hu, Transition Metal Oxides as Electrocatalysts for the Oxygen Evolution Reaction in Alkaline Solutions: An Application-Inspired Renaissance, *J. Am. Chem. Soc.*, 2018, **140**, 7748-7759.
